# Supplementary material
Source: MDPI journal article supplement (https://www.mdpi.com/2077-0472/11/12/1264)

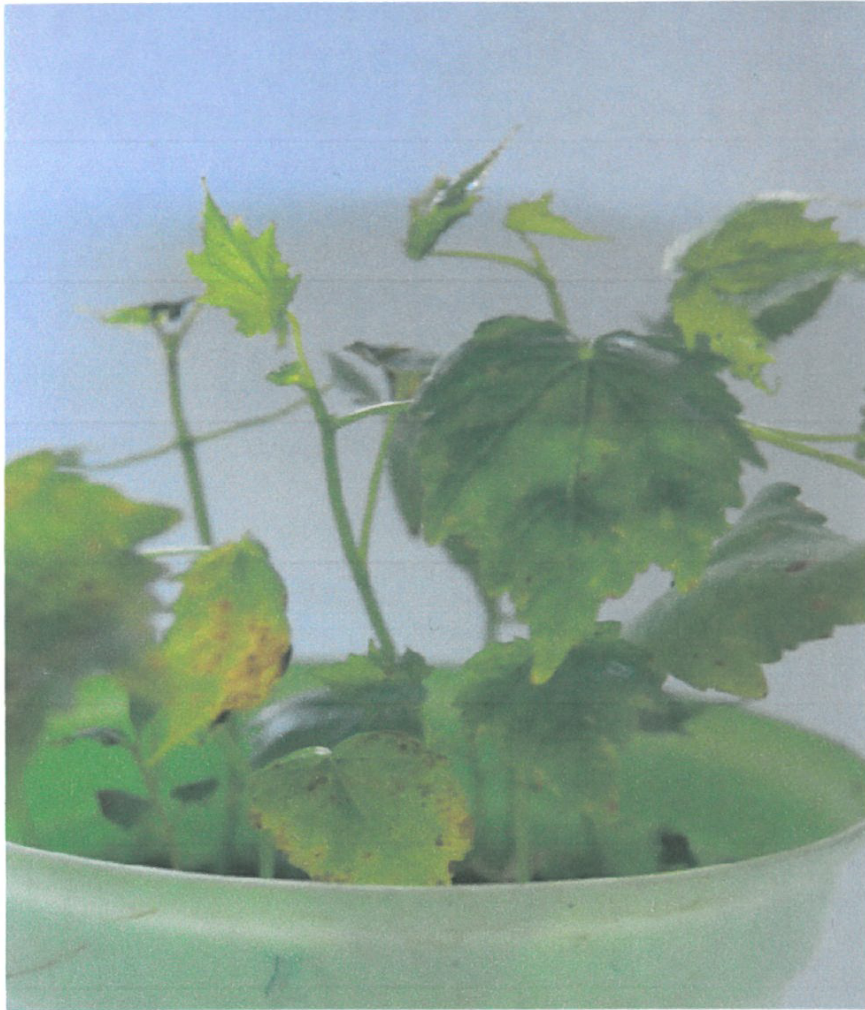

**Figure S1.** The small (3–5 mm) and larger (>5 mm) black spots were observed on all leaves of 8-week-old seedlings.

Supplement: s1 [file s1]
